# Supplementary material for: Quantifying unequal urban resilience to rainfall across China from location-aware big data
Source: Copernicus journal article supplement (doi:10.5194/nhess-23-317-2023), 2023-01-26
Supplement: Supplementary file 1 [file nhess-23-317-2023-supplement.pdf]

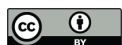

## *Supplement of*

# **Quantifying unequal urban resilience to rainfall across China from location-aware big data**

**Jiale Qian et al.**

*Correspondence to:* Yunyan Du ([duyy@reis.ac.cn](mailto:duyy@reis.ac.cn))

The copyright of individual parts of the supplement might differ from the article licence.

Sect. S1

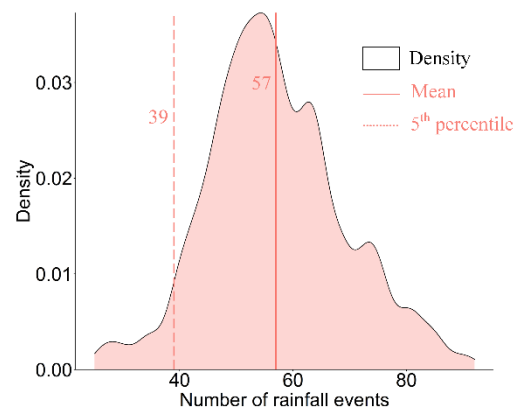

**Figs. S1.** The probability density function of the number of rainfall events for all cities.

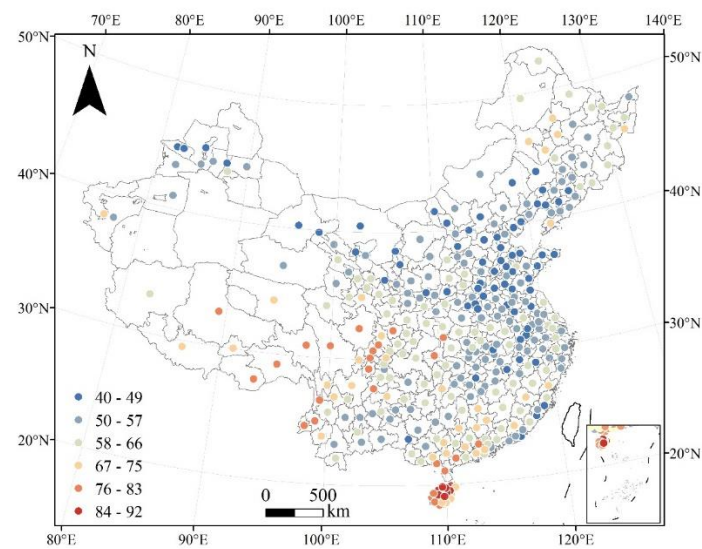

**Figs. S2.** The number of rainfall events by city.

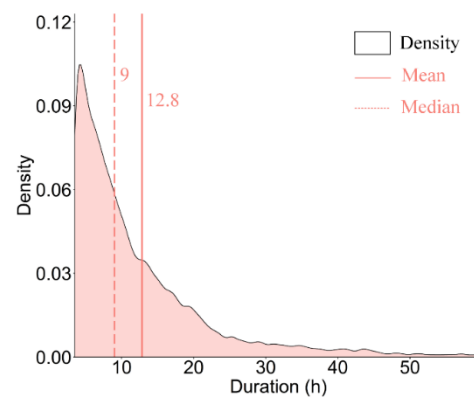

**Figs. S3.** The rainfall duration probability density function for all rainfall events.

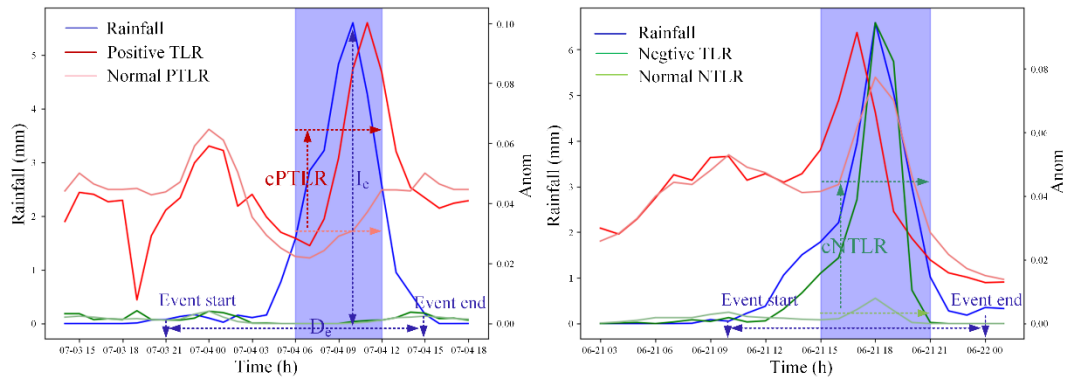

**Figs. S4.** Definitions of the variables of rainfall and human activity anomalies used in this study, as exemplified by Beijing and Zhuhai city.

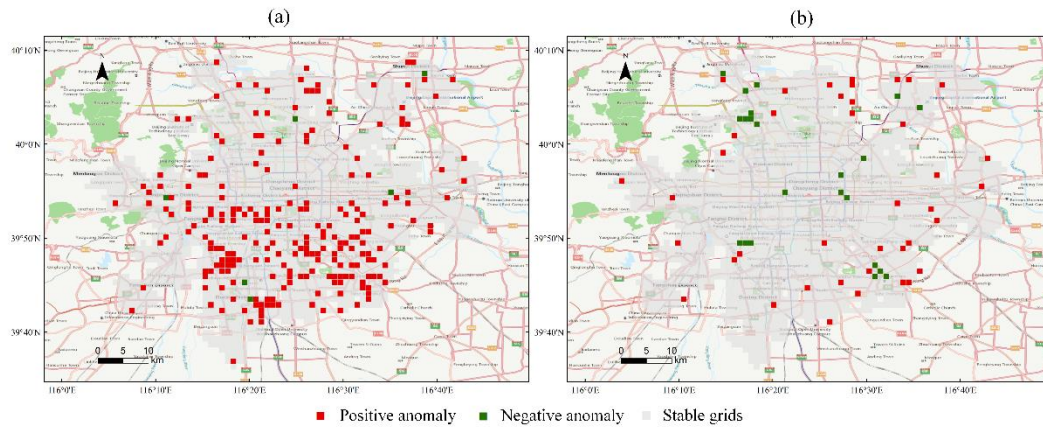

**Figs. S5.** The stable grids with positive, negative, and no anomalies in Beijing when it is raining at 10:00 am on July 04, 2017 (a) and not raining at 10:00 am on June 18, 2017 (b).

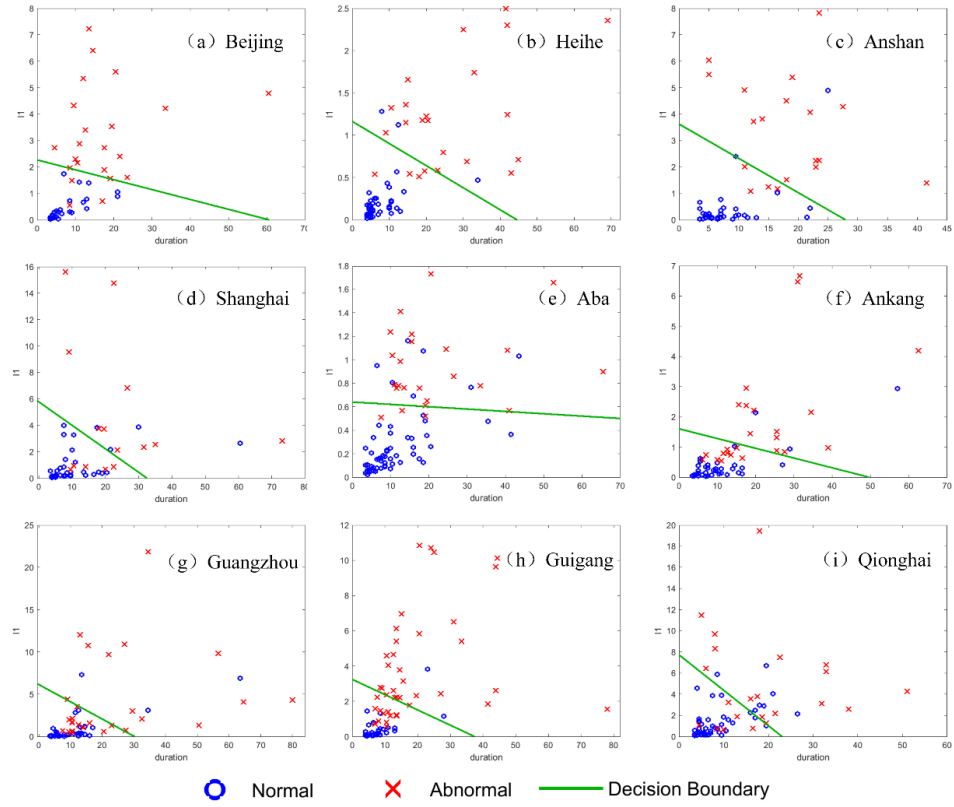

**Figs. S6.** The binary classification results of the cities in Northern(a-c), Midwestern(d-f), and Southern(g-i) China.

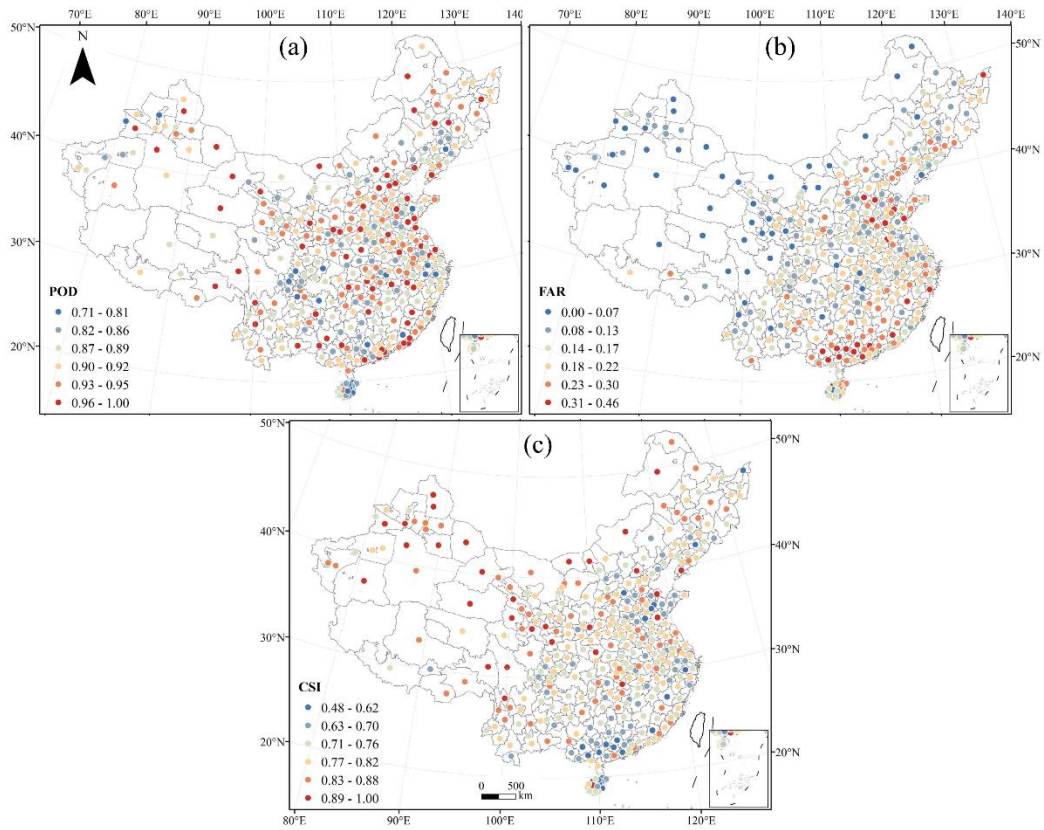

**Figs. S7.** The POD, FAR, and CSI of rainfall threshold detection based on the binary classifiers.

## Sect. S2

**Tabs. S1.** Rainfall indices uses in this study

| Rainfall indices    | Description                                 |
|---------------------|---------------------------------------------|
| Peak intensity (1h) | Hourly peak rainfall intensity              |
| Peak intensity (6h) | Six-hour-window peak rainfall intensity     |
| Cumulative rainfall | Cumulative rainfall during a rainfall event |
| Duration            | The time period a rainfall event lasts      |
| Peak hour           | The time of peak intensity(1h)              |

**Tabs. S2.** Correlations between the 3-hour rainfall threshold and explanatory variables

| Urban indices            | Coefficients | Kendall | Pearson | Spearman |
|--------------------------|--------------|---------|---------|----------|
| Annual rainfall          | 0.40***      | 0.22*** | 0.40*** | 0.31***  |
| Population density       | 0.21**       | 0.27*** | 0.40*** | 0.40***  |
| Gross domestic product   | 0.20*        | 0.25*** | 0.40*** | 0.37***  |
| Area of paved roads      | -0.16*       | -0.05   | -0.17*  | -0.07    |
| Green coverage rate      | 0.17         | 0.21**  | 0.27**  | 0.31**   |
| Drainage network density | 0.09         | 0.17*   | 0.20*   | 0.24*    |

\*\*\*p<0.001;\*\*p<0.01;\*p<0.05.  $R^2=0.40$ .

**Tabs. S3.** Correlations between the 6-hour rainfall threshold and the explanatory variables

| Urban indices            | Coefficients | Kendall | Pearson | Spearman |
|--------------------------|--------------|---------|---------|----------|
| Annual rainfall          | 0.43***      | 0.24*** | 0.42*** | 0.33***  |
| Population density       | 0.21**       | 0.26*** | 0.39*** | 0.38***  |
| Gross domestic product   | 0.20*        | 0.24*** | 0.39*** | 0.36***  |
| Area of paved roads      | -0.17*       | -0.06   | -0.19*  | -0.09    |
| Green coverage rate      | 0.16         | 0.20**  | 0.26**  | 0.30**   |
| Drainage network density | 0.10         | 0.17*   | 0.20*   | 0.24*    |

\*\*\*p<0.001;\*\*p<0.01;\*p<0.05.  $R^2=0.42$

**Tabs. S4.** Correlations between the 12-hour rainfall threshold and the explanatory variables

| Urban indices            | Coefficients | Kendall | Pearson | Spearman |
|--------------------------|--------------|---------|---------|----------|
| Annual rainfall          | 0.50***      | 0.35*** | 0.49*** | 0.50***  |
| Population density       | 0.19*        | 0.19*** | 0.31**  | 0.27**   |
| Gross domestic product   | 0.13         | 0.15*   | 0.29**  | 0.22*    |
| Area of paved roads      | -0.17*       | -0.12   | -0.23*  | -0.17    |
| Green coverage rate      | 0.07         | 0.12    | 0.17    | 0.19     |
| Drainage network density | 0.10         | 0.14*   | 0.18    | 0.20*    |

\*\*\*p<0.001;\*\*p<0.01;\*p<0.05.  $R^2=0.38$ .

**Tab. S5.** Correlations between the response sensitivity and the explanatory variables

| Urban indice                | Coefficients | Kendall  | Pearson  | Spearman |
|-----------------------------|--------------|----------|----------|----------|
| Annual rainfall             | -0.37***     | -0.22*** | -0.35*** | -0.33*** |
| Population density          | -0.19*       | -0.23*** | -0.34*** | -0.33*** |
| Gross domestic<br>product   | -0.17        | -0.23*** | -0.34*** | -0.38*** |
| Area of paved roads         | 0.05         | 0.03     | 0.05     | 0.06     |
| Green coverage rate         | -0.05        | -0.18**  | -0.20*   | -0.26**  |
| Drainage network<br>density | -0.20*       | -0.18**  | -0.29**  | -0.27**  |

\*\*\*p<0.001;\*\*p<0.01;\*p<0.05.  $R^2=0.31$
